# Supplementary material
Source: PubMed Central journal article supplement (PMC3643300)
Supplement: NIHMS464998-supplement-01.pdf [file NIHMS464998-supplement-01.pdf]

Table S1

Non-P22-like phages and prophages in figure 1

| Prophage <sup>1</sup><br>or<br>Phage | Host strain                              | Locus_tag_of_terS_gene  | Phylum; Class of host               |
|--------------------------------------|------------------------------------------|-------------------------|-------------------------------------|
| B171-1                               | <i>Escherichia coli</i> B171             | EcB171_0867             | Proteobacteria; Gammaproteobacteria |
| Bact1                                | <i>Bacteroides</i> sp. D2                | BSGG_4618               | Bacteroidetes; Bacteroidia          |
| Bpert1                               | <i>Bordetella pertussis</i> Tohamal      | BP3385                  | Proteobacteria; Betaproteobacteria  |
| Bruc1                                | <i>Brucella</i> sp. NF2653               | BR0D_2255               | Proteobacteria; Alphaproteobacteria |
| Crono1                               | <i>Cronobacter sakazakii</i> ATCCBAA-894 | ESA_02744               | Proteobacteria; Gammaproteobacteria |
| Delf1                                | <i>Delftia acidovorans</i> SPH-1         | Daci_1941               | Proteobacteria; Betaproteobacteria  |
| Dick1                                | <i>Dickeya zeae</i> Ech1591              | Dd1591_4010             | Proteobacteria; Gammaproteobacteria |
| Ent13047-1                           | <i>Enterobacter cloacae</i> ATCC13047    | ECL_03566               | Proteobacteria; Gammaproteobacteria |
| Ent9394-1                            | <i>Enterobacter cloacae</i> NCTC9394     | ENC_27700               | Proteobacteria; Gammaproteobacteria |
| ES-2*                                | <i>Cronobacter sakazakii</i>             | terminase small subunit | Proteobacteria; Gammaproteobacteria |
| Kleb1                                | <i>Klebsiella pneumoniae</i> ATCC13884   | HMPREF0484_3793         | Proteobacteria; Gammaproteobacteria |
| Niss1                                | <i>Neisseria gonorrhoeae</i> FA1090      | NGO0494                 | Proteobacteria; Betaproteobacteria  |
| Rhodo1                               | <i>Rhodospseudomonas palustris</i> TIE-1 | Rpa1_3055               | Proteobacteria; Alphaproteobacteria |
| Robig1                               | <i>Robiginitalea biformata</i> HTCC2501  | RB2501_01380            | Bacteroidetes; Flavobacteria        |
| T1*                                  | <i>Escherichia coli</i>                  | T1p54                   | Proteobacteria; Gammaproteobacteria |
| Tcarb1                               | <i>Thermosinus carboxydivorans</i> Nor1  | TcarDRAFT_1282          | Firmicutes; Negativicutes           |
| Yers1                                | <i>Yersinia pseudotuberculosis</i> YPIII | YPK_1220                | Proteobacteria; Gammaproteobacteria |
| Zymob1                               | <i>Zymomonas mobilis</i> ZM4             | ZMO0378                 | Proteobacteria; Alphaproteobacteria |

\* Fully functional phages (those without asterisks are putative prophages in bacterial genome sequences)

1. These are prophages that we have identified in bacterial genome sequenced in the extant GenBank database. Prophages are not generally named by the researchers who sequenced these bacterial genomes. These are provisional names we gave to these prophages during our studies (some prophage names are from our previous publication Casjens & Thuman-Commike (2011) Virology 411, 393-415).

Table S2

P22-like TerS proteins used in figures 1 and 2

| Prophage <sup>1</sup><br>or<br>Phage | Host species and strain                                | Genbank Locus_tag or<br>TerS gene name | Class; Family of host                                  |
|--------------------------------------|--------------------------------------------------------|----------------------------------------|--------------------------------------------------------|
| Ats1                                 | <i>Arsophonas nasoniae</i>                             | ARN_26050                              | <i>Gammaproteobacteria</i> ; <i>Enterobacteriaceae</i> |
| APSE-1                               | <i>Hamiltonella defensa</i>                            | gene 17                                | <i>Gammaproteobacteria</i> ; <i>Enterobacteriaceae</i> |
| Cart1                                | <i>Pectobacterium carotovorum</i> PBR 1692             | PcarbP_010200010662                    | <i>Gammaproteobacteria</i> ; <i>Enterobacteriaceae</i> |
| CUS-3*                               | <i>Escherichia coli</i> serotype K1                    | gene 22                                | <i>Gammaproteobacteria</i> ; <i>Enterobacteriaceae</i> |
| H591-1                               | <i>Escherichia coli</i> H591                           | ECPG_00988                             | <i>Gammaproteobacteria</i> ; <i>Enterobacteriaceae</i> |
| HK620                                | <i>Escherichia coli</i> serotype H                     | gene <i>hkbO</i>                       | <i>Gammaproteobacteria</i> ; <i>Enterobacteriaceae</i> |
| IME10*                               | <i>Enterobacteria</i> (host species not published)     | gene 3                                 | <i>Gammaproteobacteria</i> ; <i>Enterobacteriaceae</i> |
| Miss1                                | <i>Salmonella enterica</i> serotype Mississippi A4-633 | LTSEMIS_1103                           | <i>Gammaproteobacteria</i> ; <i>Enterobacteriaceae</i> |
| φSG1                                 | <i>Sodalis glossinidius</i>                            | gene 01                                | <i>Gammaproteobacteria</i> ; <i>Enterobacteriaceae</i> |
| P22*                                 | <i>Salmonella enterica</i> serotype Typhimurium        | gene 3                                 | <i>Gammaproteobacteria</i> ; <i>Enterobacteriaceae</i> |
| Rett1                                | <i>Providencia rettgeri</i> DSM 1131                   | PROVRETT_06006                         | <i>Gammaproteobacteria</i> ; <i>Enterobacteriaceae</i> |
| Serr1                                | <i>Serratia plymuthica</i> AS9                         | SerAS9_2692                            | <i>Gammaproteobacteria</i> ; <i>Enterobacteriaceae</i> |
| Sif*                                 | <i>Shigella flexneri</i> serotype Y                    | gene 1                                 | <i>Gammaproteobacteria</i> ; <i>Enterobacteriaceae</i> |
| SPC-P1*                              | <i>Salmonella enterica</i> serotype Paratyphi B        | ESRG_00795                             | <i>Gammaproteobacteria</i> ; <i>Enterobacteriaceae</i> |
| TA124-1                              | <i>Escherichia coli</i> TA124                          | LTSEUGA_0536                           | <i>Gammaproteobacteria</i> ; <i>Enterobacteriaceae</i> |
| Ugan1                                | <i>Salmonella enterica</i> serotype Uganda R8-3404     | LTSEWAN_0986                           | <i>Gammaproteobacteria</i> ; <i>Enterobacteriaceae</i> |
| Wand1                                | <i>Salmonella enterica</i> serotype Wandsworth A4-580  | LTSEWAN_0986                           | <i>Gammaproteobacteria</i> ; <i>Enterobacteriaceae</i> |

\* Fully functional phages (those without asterisks are putative prophages in bacterial genome sequences)

1. These are prophages that we have identified in bacterial genome sequenced in the extant GenBank database. Prophages are not generally named by the researchers who sequenced these bacterial genomes. These are provisional names we gave to these prophages during our studies (some prophage names are from our previous publication Casjens & Thuman-Commike (2011) Virology 411, 393-415).

Table S3

Oligonucleotides used in this study

|   |                                                                                         |
|---|-----------------------------------------------------------------------------------------|
| A | 5'-GAGGGCGGAAAGAGTCCTCAGCCTGAAATAACAACCTAAGTGAGATGAATCCTGTTGACAATTAATCATCCGGCA          |
| B | 5'-GATACGAGAGCGTCGCTTATCGCGATCTCCCTTATCAGGTGTCACGTCTTTTCAGCACTGTCCCTGCTCCTT             |
| C | 5'-GAGGGCGGAAAGAGTCCTCAGCCTGAAATAACAACCTAAGTGAGATGAATATGGCGACTGAACCCAAAAGC              |
| D | 5'-GATACGAGAGCGTCGCTTATCGCGATCTCCCTTATCAGGTGTCACGTCTTGTGCGCCATACTTACGGGG                |
| E | 5'-ACGATTCTAGAGACTTACCAAGCTGGTTACC                                                      |
| F | 5'-CAATCAAGCTTCTGTTCACCTACCGGAGCATG                                                     |
| G | 5'-TCATTGAGGATTATATTAAGAACAATTTTACAATTAATAACACCAACACCCCCCAAACCC                         |
| H | 5'-CGAAGAGCTATGGGAAATTTTGTGGAAGAACAATAATAACACACAACCCACACACACCAC                         |
| I | 5'-ATTAAGAGTAATAACTCCGTCTGTGGCATGGTACACCGGTTAAGACCCCACTTTCACATT                         |
| J | 5'-AATGCTGAATTCAGACGCAGAAATTTGTCTGCTTACCCTCCTAAGCACTTGTCTCCTG                           |
| K | 5'-CGGTCAGCGACATCCATTTTCGCGAATCCGGCCGCACTGGCCCCCGATGGTCAACCGTACCG                       |
| L | 5'-CGGTCAGCGACATCCATTTTCGCGAATCCGGAGTAAATAATCGCCTGAGAGAAGATTTATCTGAAGTCGTTACGC<br>GAG   |
| M | 5'-ACCGGTACGGTTGACCATCGGGGGCCAGTGGGGGTTTCATCTCGCGTAACGACTTCAGATAAATCTTCTCTCAGGC<br>GATA |
